# Supplementary material for: Inhibitory Effects of Ehretia tinifolia Extract on the Excessive Oxidative and Inflammatory Responses in Lipopolysaccharide-Stimulated Mouse Kupffer Cells
Source: MDPI journal article supplement (doi:10.3390/antiox12101792), 2023-09-22
Supplement: s1 [file s1]

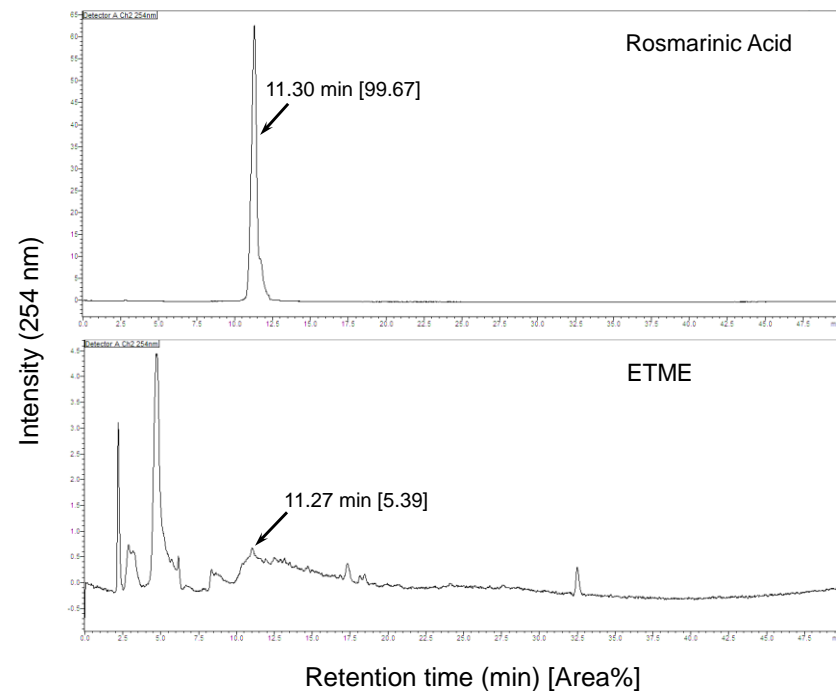

**Supplementary figure S1.** HPLC chromatogram of Rosmarinic acid and ETME. The results were analyzed using a HPLC system (Shimadzu Corp., Japan) with a SPD-20A UV/Vis detector, a LC-20AR solvent pump. Chromatography was achieved on an Atlantis T3 Column (4.6 mm x 250 mm, 5  $\mu$ m) and monitored at 254 nm. Linear gradients at flow rate 1 ml/min with H<sub>2</sub>O (A) and CH<sub>3</sub>CN (B) were applied as follows: 0–40 min, 10 to 90% B, 40–50 min, 90% to 100% B.

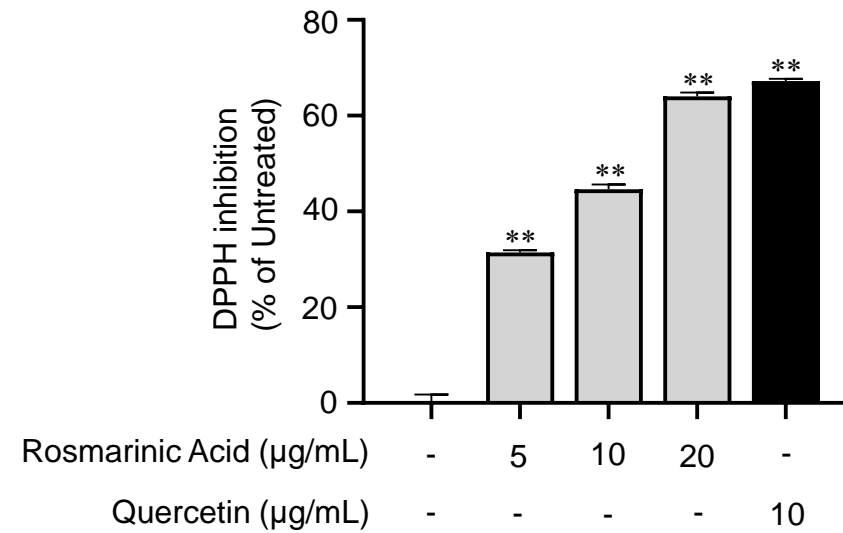

**Supplementary figure S2.** Radical scavenging effect of rosmarinic acid. The DPPH inhibition was expressed as % using the OD value of the experimental group and the value of 100% methanol solution (as a negative control). Quercetin was used as positive control.
